# Supplementary material for: Analysis of the impact of remote oxygen plasma treatment on the surface chemistry and electrochemical properties of graphite felt electrodes for redox flow batteries
Source: Royal Society of Chemistry journal article supplement (doi:10.1039/d4ya00383g), 2024-01-01
Supplement: d4ya00383g1.pdf [file d4ya00383g1.pdf]

# Analysis of the Impact of Remote Oxygen Plasma Treatment on the Surface Chemistry and Electrochemical Properties of Graphite Felt Electrodes for Redox Flow Batteries

L. Mauricio Murillo-Herrera<sup>[a]\*</sup>, Carlos J. Mingo<sup>[a]</sup>, J. Obrero-Pérez<sup>[b]</sup>, Juan R. Sánchez-Valencia<sup>[b]</sup>, Michael W. Thielke<sup>[a]</sup>, Ángel Barranco<sup>[b]</sup>, Ana B. Jorge Sobrido<sup>[a]\*</sup>.

<sup>[a]</sup>School of Engineering and Materials Science. Queen Mary University of London. Mile End Rd, London E1 4NS, United Kingdom

<sup>[b]</sup>Instituto de Ciencia de Materiales de Sevilla. Consejo Superior de Investigaciones Científicas. c/Américo Vespucio 49, 41092, Sevilla, Spain.

## Table of contents

|                                                                                                                                                                                                           |    |
|-----------------------------------------------------------------------------------------------------------------------------------------------------------------------------------------------------------|----|
| <b>Table S1:</b> Deconvolution of High resolution XPS data .....                                                                                                                                          | 2  |
| <b>Table S2:</b> Raman analysis including Gaussian and Lorentzian contributions for each band ..                                                                                                          | 6  |
| <b>Figure S1:</b> Pristine <b>GF</b> high resolution C1s & O1s spectra. 3                                                                                                                                 |    |
| <b>Figure S2:</b> <b>GF400</b> high resolution C1s & O1s spectra. ....                                                                                                                                    | 3  |
| <b>Figure S3:</b> Anomalous <b>GF400</b> high resolution C1s & O1s spectra. ....                                                                                                                          | 4  |
| <b>Figure S4:</b> <b>P10s</b> high resolution C1s & O1s spectra.....                                                                                                                                      | 4  |
| <b>Figure S5:</b> <b>P60s</b> high resolution C1s & O1s spectra.....                                                                                                                                      | 5  |
| <b>Figure S6:</b> <b>P600s</b> high resolution C1s & O1s spectra.....                                                                                                                                     | 5  |
| <b>Figure S7:</b> Pristine <b>GF</b> Raman spectrum and D/G band deconvolution.....                                                                                                                       | 7  |
| <b>Figure S8:</b> <b>GF400</b> Raman spectrum and D/G band deconvolution.....                                                                                                                             | 7  |
| <b>Figure S9:</b> <b>P10s</b> Raman spectrum and D/G band deconvolution. ....                                                                                                                             | 7  |
| <b>Figure S10:</b> <b>P60s</b> Raman spectrum and D/G band deconvolution. ....                                                                                                                            | 7  |
| <b>Figure S11:</b> <b>P600s</b> Raman spectrum and D/G band deconvolution. ....                                                                                                                           | 8  |
| <b>Figure S12:</b> Pristine <b>GF</b> cyclic voltammetry showcasing non-faradaic current at different scan rates and linear fit of a current vs scan rate plot. ....                                      | 9  |
| <b>Figure S13:</b> <b>GF400</b> cyclic voltammetry showcasing non-faradaic current at different scan rates and linear fit of a current vs scan rate plot. ....                                            | 9  |
| <b>Figure S14:</b> <b>P10s</b> cyclic voltammetry showcasing non-faradaic current at different scan rates and linear fit of a current vs scan rate plot. ....                                             | 10 |
| <b>Figure S15:</b> <b>P60s</b> cyclic voltammetry showcasing non-faradaic current at different scan rates and linear fit of a current vs scan rate plot. ....                                             | 10 |
| <b>Figure 16:</b> <b>P60s</b> cyclic voltammetry showcasing non-faradaic current at different scan rates and linear fit of a current vs scan rate plot. ....                                              | 11 |
| <b>Figure S21:</b> Pore-size distributions from electrodes as derived from BET analysis.....                                                                                                              | 12 |
| <b>Figure S22:</b> Schematic of a Single-electrolyte flow cell. ....                                                                                                                                      | 13 |
| <b>Figure S23:</b> Breakdown of impedance contributions: Ohmic resistance ( $R_s$ ), charge-transfer resistance ( $R_{ct}$ ) and mass-transport resistance ( $R_{mt}$ ) at 110 mL min <sup>-1</sup> ..... | 13 |
| <b>Figure S24:</b> Breakdown of impedance contributions: Ohmic resistance ( $R_s$ ), charge-transfer resistance ( $R_{ct}$ ) and mass-transport resistance ( $R_{mt}$ ) at 50 mL min <sup>-1</sup> .....  | 14 |
| <b>Figure S25:</b> Breakdown of impedance contributions: Ohmic resistance ( $R_s$ ), charge-transfer resistance ( $R_{ct}$ ) and mass-transport resistance ( $R_{mt}$ ) at 30 mL min <sup>-1</sup> .....  | 14 |
| <b>Figure S26:</b> Breakdown of impedance contributions: Ohmic resistance ( $R_s$ ), charge-transfer resistance ( $R_{ct}$ ) and mass-transport resistance ( $R_{mt}$ ) at 10 mL min <sup>-1</sup> .....  | 15 |
| <b>Figure S17:</b> Pressure drop plot from different electrodes showcasing curve hysteresis.....                                                                                                          | 16 |
| <b>Figure S18:</b> Schematic of a Flow cell set up to perform pressure drop measurements.....                                                                                                             | 16 |

|                                                                                     |    |
|-------------------------------------------------------------------------------------|----|
| <b>Figure S19:</b> Darcy-Forchheimer fitting. ....                                  | 16 |
| <b>Figure S20:</b> Permeability values derived from Darcy-Forchheimer fitting ..... | 17 |

| Chemical shift                 | GF Pristine |         |         | GF400   |         |         | GF400 anomalous |         |         | PFDs    |         |         | P60s    |         |         |         |         |         |
|--------------------------------|-------------|---------|---------|---------|---------|---------|-----------------|---------|---------|---------|---------|---------|---------|---------|---------|---------|---------|---------|
|                                | Sample1     | Sample2 | Sample3 | Sample1 | Sample2 | Sample3 | Sample1         | Sample2 | Sample3 | Sample1 | Sample2 | Sample3 | Average | STD     | Average | STD     | Average | STD     |
| C1s                            | 80.63       | 77.96   | 77.82   | 78.80   | 76.73   | 74.15   | 76.62           | 75.83   | 74.46   | 63.74   | 69.20   | 69.97   | 70.13   | 69.79   | 0.52    | 74.74   | 76.66   | 69.33   |
| C-C                            | 7.28        | 8.45    | 7.51    | 7.72    | 0.01    | 7.22    | 6.06            | 6.93    | 6.74    | 13.41   | 3.93    | 6.99    | 3.09    | 4.69    | 0.94    | 5.02    | 5.28    | 6.74    |
| C-C <sub>low BE</sub> /C-H     | 0.78        | 0.78    | 0.78    | 0.78    | 0.78    | 0.78    | 0.78            | 0.78    | 0.78    | 0.78    | 0.78    | 0.78    | 0.78    | 0.78    | 0.78    | 0.78    | 0.78    | 0.78    |
| C-C <sub>high BE</sub> /Adv. C | 0.60        | 0.70    | 1.69    | 0.93    | 0.49    | 1.36    | 2.32            | 1.31    | 0.95    | 5.93    | 3.77    | 4.20    | 5.18    | 4.38    | 0.72    | 4.25    | 6.07    | 4.72    |
| C-O                            | 0.72        | 1.01    | 0.55    | 0.76    | 0.23    | 2.27    | 2.06            | 1.37    | 1.90    | 0.47    | 5.95    | 4.77    | 3.52    | 4.75    | 1.22    | 2.12    | 0.87    | 2.46    |
| O-C=O                          | 0.32        | 0.56    | 0.48    | 0.45    | 0.12    | 1.19    | 0.65            | 0.96    | 0.93    | 0.27    | 0.80    | 4.14    | 4.66    | 4.47    | 0.28    | 3.16    | 3.69    | 3.44    |
| π-π*                           | 9.52        | 9.78    | 8.51    | 9.27    | 0.67    | 10.38   | 8.12            | 8.93    | 9.14    | 1.15    | 0.00    | 4.99    | 4.89    | 6.65    | 5.51    | 0.99    | 5.87    | 4.74    |
| Residual STD                   | 1.51        | 1.07    | 1.20    | 1.26    | 1.60    | 1.01    | 1.26            | 1.11    | 1.25    | 1.16    | 1.11    | 1.25    | 1.16    | 1.17    | 1.38    | 1.38    | 1.07    | 1.11    |
| O1s                            | 53.19       | 55.67   | 48.02   | 52.29   | 3.90    | 60.37   | 36.32           | 48.02   | 48.24   | 12.03   | Sample1 | Sample2 | Sample3 | Average | STD     | Sample1 | Sample2 | Sample3 |
| C=O                            | 39.78       | 40.64   | 45.62   | 42.01   | 3.15    | 33.20   | 61.02           | 45.62   | 46.61   | 13.94   | 45.80   | 42.10   | 46.23   | 51.58   | 48.71   | 5.51    | 38.91   | 31.02   |
| C-O aliphatic                  | 6.46        | 3.69    | 6.35    | 5.90    | 1.57    | 6.42    | 2.66            | 6.32    | 5.13    | 2.14    | 0.48    | 3.93    | 4.59    | 5.43    | 4.65    | 0.75    | 5.86    | 66.38   |
| Adv. O2, H2O                   | 1.16        | 0.95    | 0.96    | 1.02    | 1.07    | 0.94    | 0.91            | 0.97    | 0.91    | 0.97    | 2.47    | 0.92    | 0.99    | 0.83    | 0.91    | 0.88    | 0.92    | 1.01    |
| Residual STD                   | 1.16        | 0.95    | 0.96    | 1.02    | 1.07    | 0.94    | 0.91            | 0.97    | 0.91    | 0.97    | 2.47    | 0.92    | 0.99    | 0.83    | 0.91    | 0.88    | 0.92    | 1.01    |
| Regions                        | Sample1     | Sample2 | Sample3 | Sample1 | Sample2 | Sample3 | Sample1         | Sample2 | Sample3 | Sample1 | Sample2 | Sample3 | Average | STD     | Sample1 | Sample2 | Sample3 | Average |
| C1s                            | 80.64       | 77.97   | 77.82   | 78.80   | 76.73   | 74.15   | 76.62           | 75.83   | 74.46   | 63.74   | 69.20   | 69.97   | 70.13   | 69.79   | 0.52    | 74.74   | 76.66   | 69.33   |
| O1s                            | 53.19       | 55.67   | 48.02   | 52.29   | 3.90    | 60.37   | 36.32           | 48.02   | 48.24   | 12.03   | Sample1 | Sample2 | Sample3 | Average | STD     | Sample1 | Sample2 | Sample3 |
| Residual STD                   | 1.16        | 0.95    | 0.96    | 1.02    | 1.07    | 0.94    | 0.91            | 0.97    | 0.91    | 0.97    | 2.47    | 0.92    | 0.99    | 0.83    | 0.91    | 0.88    | 0.92    | 1.01    |

## XPS analysis.

Table S1: Deconvolution of High resolution XPS data

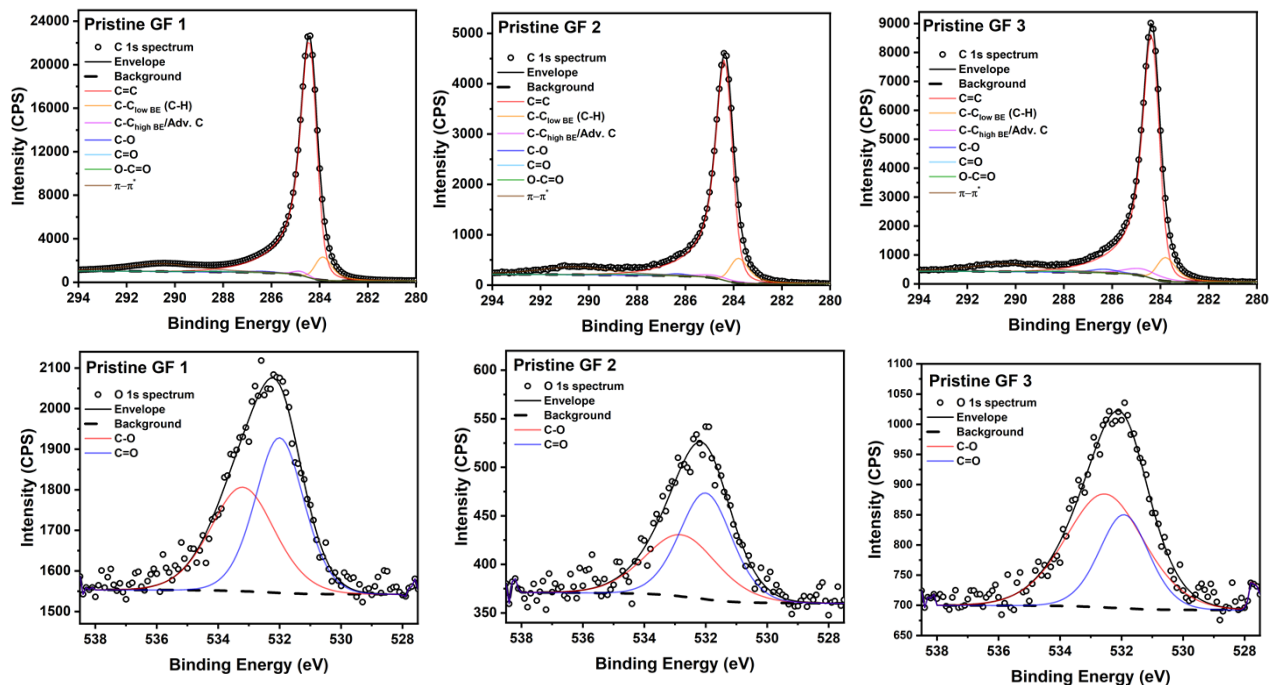

Figure S1: Pristine GF high resolution C1s & O1s spectra.

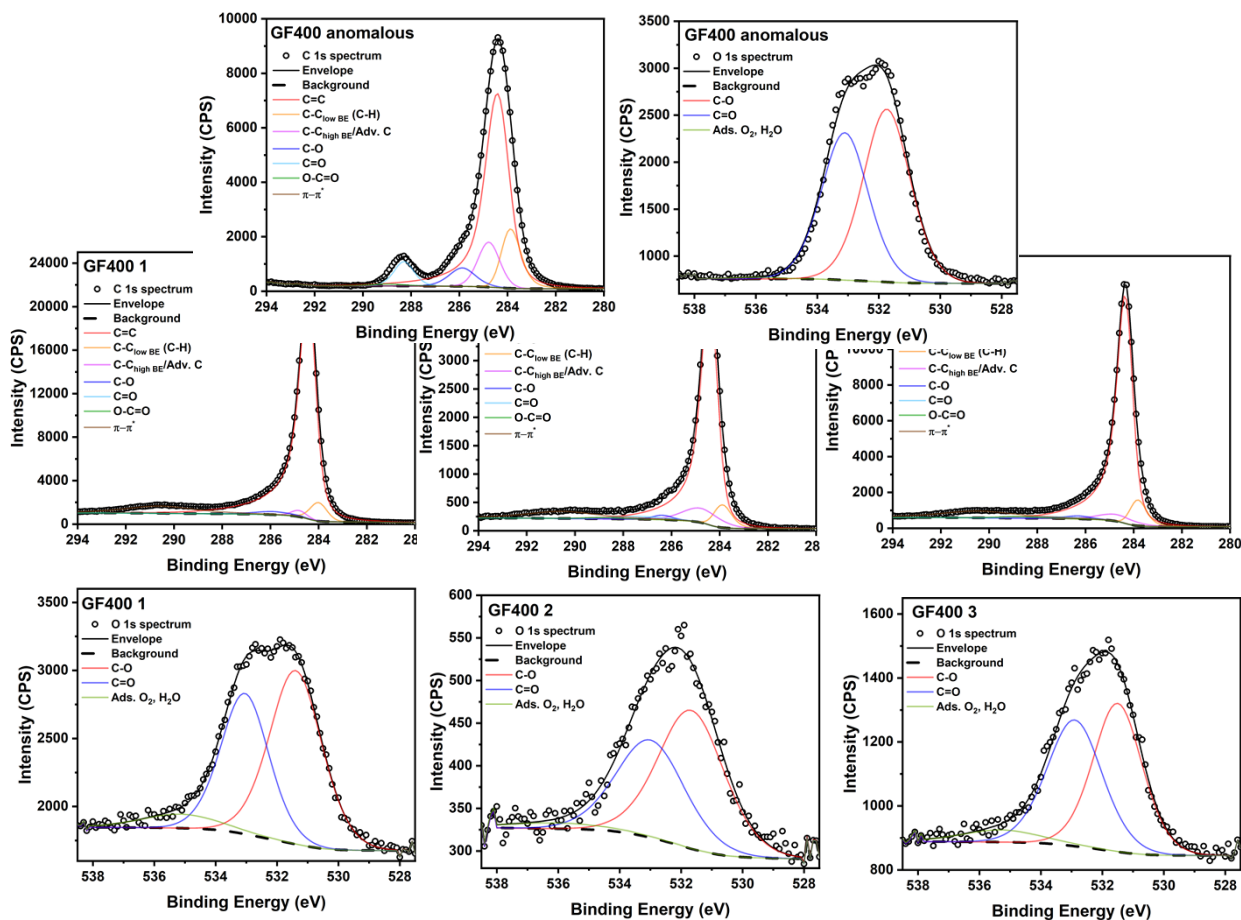

Figure S2: GF400 high resolution C1s & O1s spectra.

Figure S3: Anomalous GF400 high resolution C1s & O1s spectra.

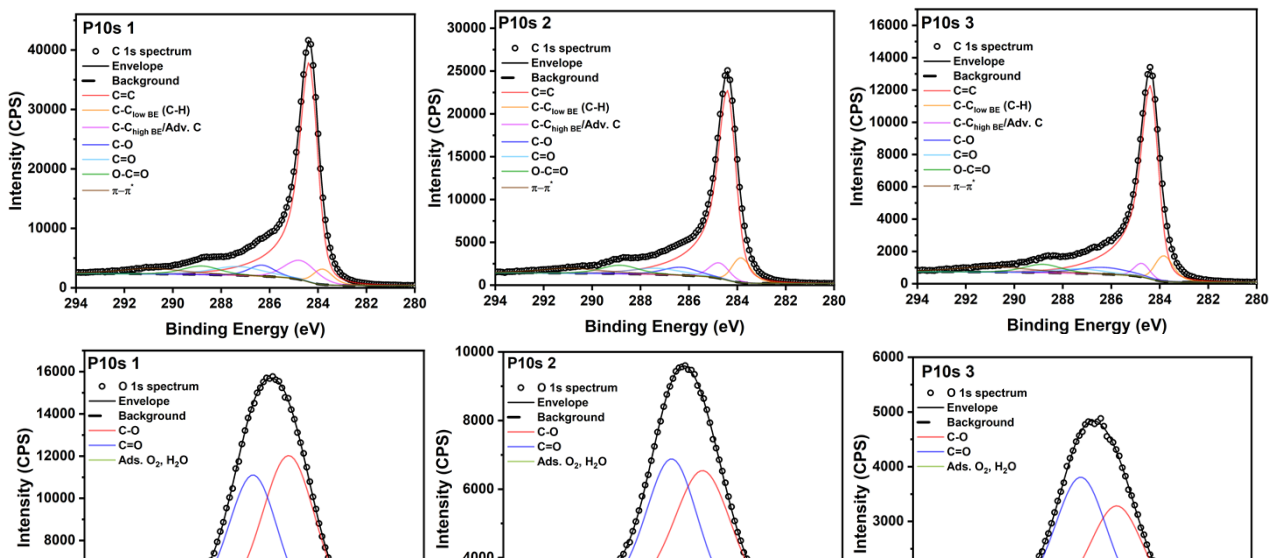

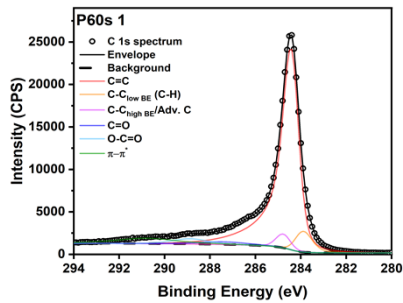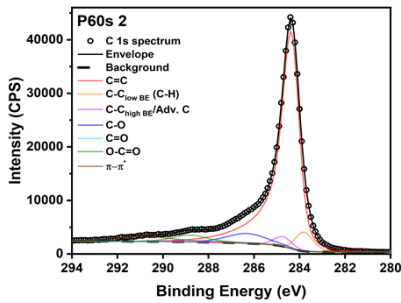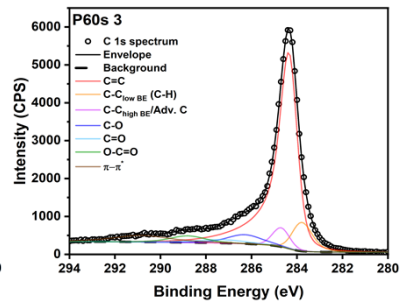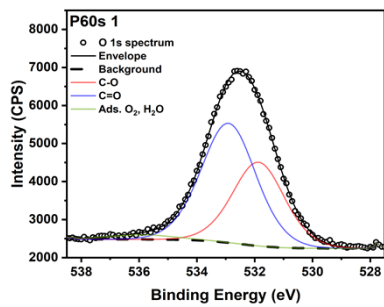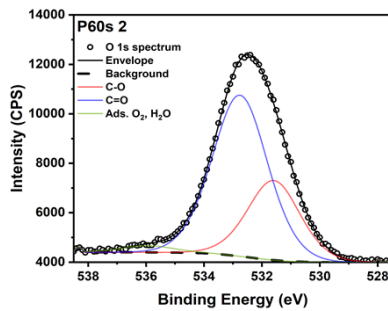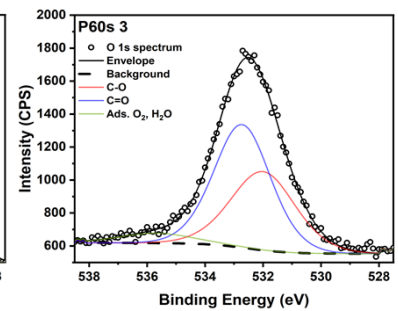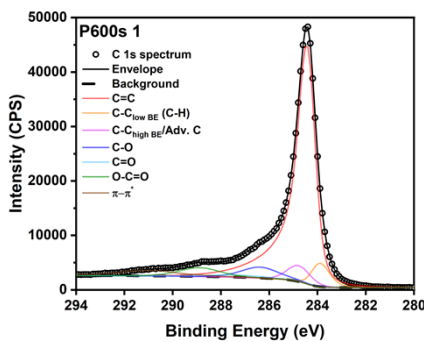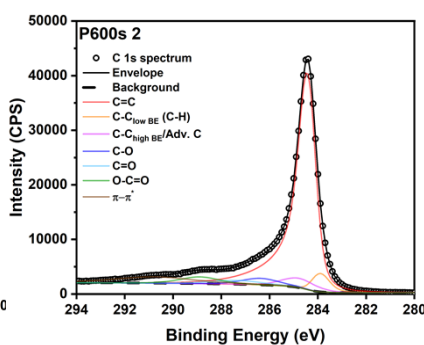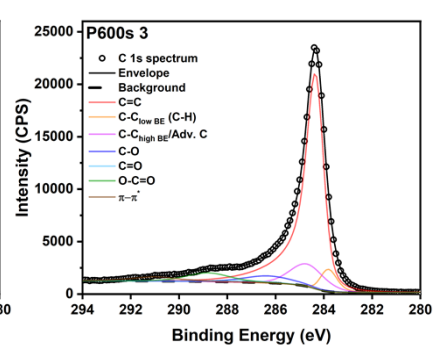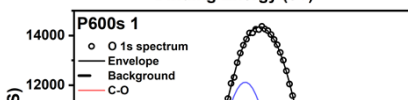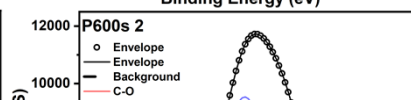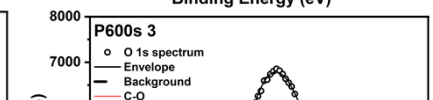

# Raman

**Table S2:**  
analysis  
Gaussian  
Lorentzian

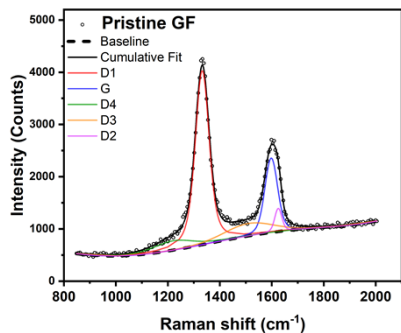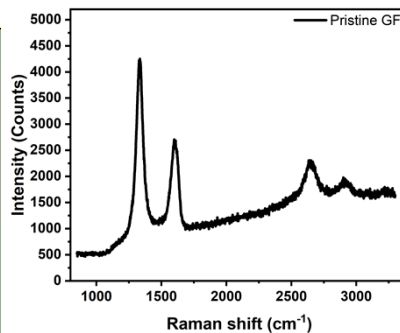

contributions for each band

|                 | GF400       |            | P10s        |            | P60s        |            | P0s         |            |
|-----------------|-------------|------------|-------------|------------|-------------|------------|-------------|------------|
|                 | Value       | Range      | Value       | Range      | Value       | Range      | Value       | Range      |
| <b>D1 band</b>  | 1332.94587  | 1320to1360 | 1333.57716  | 1320to1360 | 1332.5819   | 1320to1360 | 1332.5819   | 1320to1360 |
| Area            | 432141.682  |            | 254386.9861 |            | 482337.7709 |            | 482337.7709 |            |
| wG              | 39.0275     | 5-60       | 40.53759    | 5-60       | 36.17939    | 5-60       | 36.17939    | 5-60       |
| wL              | 40          | 5-40       | 40          | 5-40       | 40          | 5-40       | 40          | 5-40       |
| FWHM            | 64.62409    |            | 65.99181    |            | 62.07194    |            | 62.07194    |            |
| Area %          | 70.70440982 |            | 62.83770222 |            | 69.37630864 |            | 69.37630864 |            |
| <b>G band</b>   | 1599.08449  | 1580to1610 | 1599.32798  | 1580to1610 | 1598.34704  | 1580to1610 | 1598.34704  | 1580to1610 |
| Area            | 116368.3965 |            | 78523.97752 |            | 146900.9471 |            | 146900.9471 |            |
| Gw              | 60          | 5-60       | 59.91332    | 5-60       | 60          | 5-60       | 60          | 5-60       |
| Lw              | 6.26352     | 5-60       | 5           | 5-60       | 6.28942     | 5-60       | 6.28942     | 5-60       |
| FWHM            | 63.41925    |            | 62.6315     |            | 63.43368    |            | 63.43368    |            |
| Area %          | 19.03949362 |            | 19.39669317 |            | 21.12927093 |            | 21.12927093 |            |
| <b>D4 band</b>  | 1210        | 1190to1210 | 1210        | 1190to1210 | 1210        | 1190to1210 | 1210        | 1190to1210 |
| Area            | 32756.92096 |            | 18721.27312 |            | 32050.27745 |            | 32050.27745 |            |
| Gw              | 161.39144   | 50-200     | 139.3241    | 50-200     | 129.30389   | 50-200     | 129.30389   | 50-200     |
| Lw              | 5           | 50-200     | 5           | 50-200     | 62.15468    | 50-200     | 62.15468    | 50-200     |
| FWHM            | 164.08122   |            | 142.01653   |            | 165.72796   |            | 165.72796   |            |
| Area %          | 5.3594894   |            | 4.624457421 |            | 4.609902177 |            | 4.609902177 |            |
| <b>D3 band</b>  | 1513.50276  | 1510to1530 | 1510        | 1510to1530 | 1510        | 1510to1530 | 1510        | 1510to1530 |
| Area            | 61065.86035 |            | 70299.72608 |            | 64389.82262 |            | 64389.82262 |            |
| Gw              | 100         | 5-150      | 150         | 5-150      | 100         | 5-150      | 100         | 5-150      |
| Lw              | 100         | 5-150      | 125.89049   | 5-150      | 100         | 5-150      | 100         | 5-150      |
| FWHM            | 163.75959   |            | 228.3376    |            | 163.75959   |            | 163.75959   |            |
| Area %          | 9.991226943 |            | 17.36516998 |            | 9.261410731 |            | 9.261410731 |            |
| <b>D2 band</b>  | 1618.86937  | 1610to1630 | 1621.08663  | 1610to1630 | 1619.99649  | 1610to1630 | 1619.48278  | 1610to1630 |
| Area            | 38559.83526 |            | 11917.99331 |            | 36655.05744 |            | 13323.08427 |            |
| Gw              | 39.04722    | 5-50       | 34.25234    | 5-50       | 37.40419    | 5-50       | 38.70823    | 5-50       |
| Lw              | 5           | 5-50       | 5           | 5-50       | 5           | 5-50       | 5           | 5-50       |
| FWHM            | 41.7895     |            | 37.0043     |            | 40.14951    |            | 41.45211    |            |
| Area %          | 6.308927161 |            | 2.943937212 |            | 5.272223598 |            | 3.802905325 |            |
| <b>Pristine</b> |             |            |             |            |             |            |             |            |
| <b>D1 band</b>  | 1332.14763  |            | 1332.57716  |            | 1332.5819   |            | 1332.5819   |            |
| Area            | 289903.8301 |            | 254386.9861 |            | 482337.7709 |            | 482337.7709 |            |
| wG              | 36.80391    |            | 40.53759    |            | 36.17939    |            | 36.17939    |            |
| wL              | 40          |            | 40          |            | 40          |            | 40          |            |
| FWHM            | 62.62825    |            | 65.99181    |            | 62.07194    |            | 62.07194    |            |
| Area %          | 66.51077466 |            | 62.83770222 |            | 69.37630864 |            | 69.37630864 |            |
| <b>G band</b>   | 1599.62903  |            | 1599.32798  |            | 1598.34704  |            | 1598.34704  |            |
| Area            | 108176.8039 |            | 78523.97752 |            | 146900.9471 |            | 146900.9471 |            |
| Gw              | 59.63946    |            | 59.91332    |            | 60          |            | 60          |            |
| Lw              | 8.90526     |            | 5           |            | 6.28942     |            | 6.28942     |            |
| FWHM            | 64.54405    |            | 62.6315     |            | 63.43368    |            | 63.43368    |            |
| Area %          | 24.44516246 |            | 19.39669317 |            | 21.12927093 |            | 21.12927093 |            |
| <b>D4 band</b>  | 1210        |            | 1210        |            | 1210        |            | 1210        |            |
| Area            | 28893.98248 |            | 18721.27312 |            | 32050.27745 |            | 32050.27745 |            |
| Gw              | 57.69697    |            | 139.3241    |            | 129.30389   |            | 129.30389   |            |
| Lw              | 200         |            | 5           |            | 62.15468    |            | 62.15468    |            |
| FWHM            | 216.43228   |            | 142.01653   |            | 165.72796   |            | 165.72796   |            |
| Area %          | 6.529293436 |            | 4.624457421 |            | 4.609902177 |            | 4.609902177 |            |
| <b>D3 band</b>  | 1510        |            | 1510        |            | 1510        |            | 1510        |            |
| Area            | 42824.71936 |            | 70299.72608 |            | 64389.82262 |            | 64389.82262 |            |
| Gw              | 100         |            | 150         |            | 100         |            | 100         |            |
| Lw              | 100         |            | 125.89049   |            | 100         |            | 100         |            |
| FWHM            | 163.75959   |            | 228.3376    |            | 163.75959   |            | 163.75959   |            |
| Area %          | 9.677280009 |            | 17.36516998 |            | 9.261410731 |            | 9.261410731 |            |
| <b>D2 band</b>  | 1623.11865  | 1610to1630 | 1621.08663  | 1610to1630 | 1619.99649  | 1610to1630 | 1619.48278  | 1610to1630 |
| Area            | 10482.65493 |            | 11917.99331 |            | 36655.05744 |            | 13323.08427 |            |
| Gw              | 29.99223    | 5-50       | 34.25234    | 5-50       | 37.40419    | 5-50       | 38.70823    | 5-50       |
| Lw              | 5           | 5-50       | 5           | 5-50       | 5           | 5-50       | 5           | 5-50       |
| FWHM            | 32.75537    |            | 37.0043     |            | 40.14951    |            | 41.45211    |            |
| Area %          | 2.368809148 |            | 2.943937212 |            | 5.272223598 |            | 3.802905325 |            |

**Figure S7:** Pristine GF Raman spectrum and D/G band deconvolution.

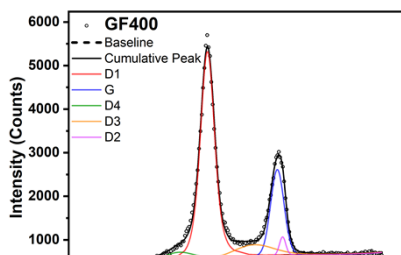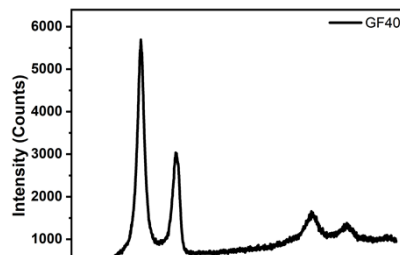

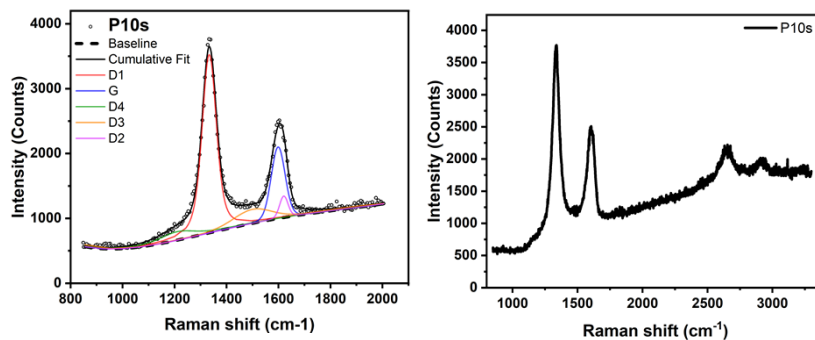

**Figure S9: P10s Raman spectrum and D/G band deconvolution.**

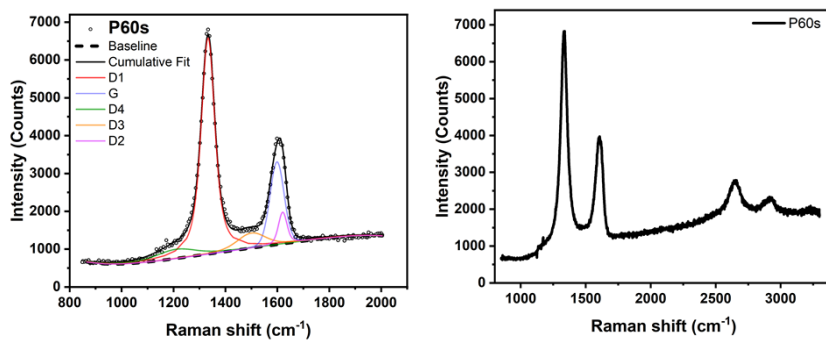

**Figure S10: P60s Raman spectrum and D/G band deconvolution.**

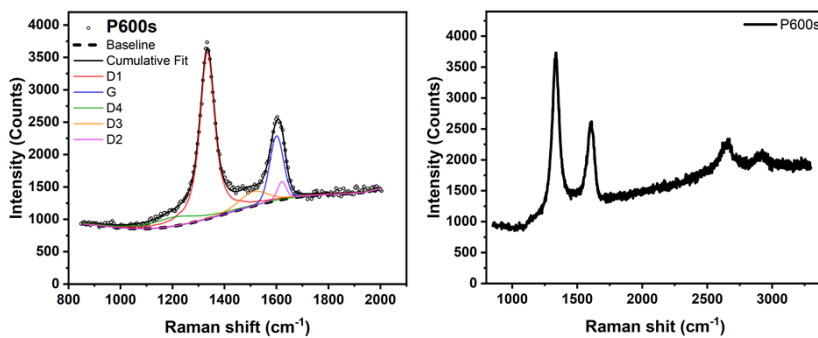

**Figure S11: P600s Raman spectrum and D/G band deconvolution.**





## Electrochemical double layer capacitance analysis

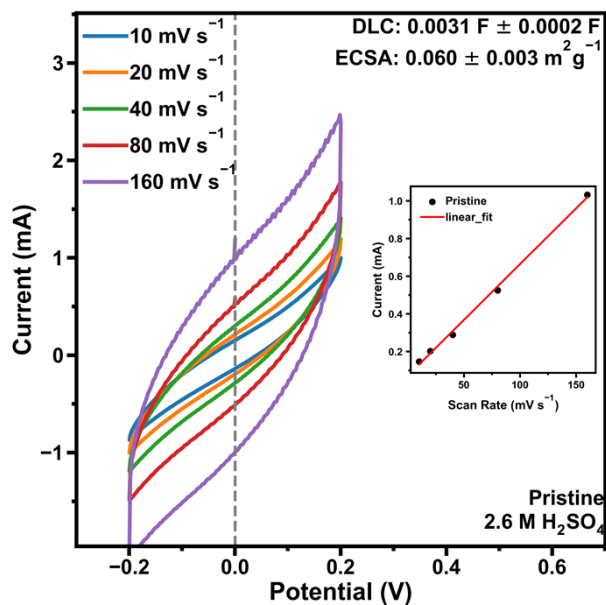

**Figure S12:** Pristine GF cyclic voltammetry showcasing non-faradaic current at different scan rates and linear fit of a current vs scan rate plot.

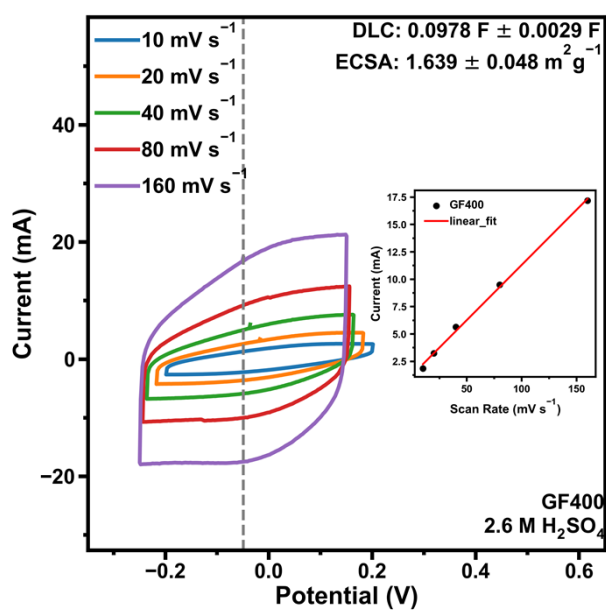

**Figure S13:** GF400 cyclic voltammetry showcasing non-faradaic current at different scan rates and linear fit of a current vs scan rate plot.

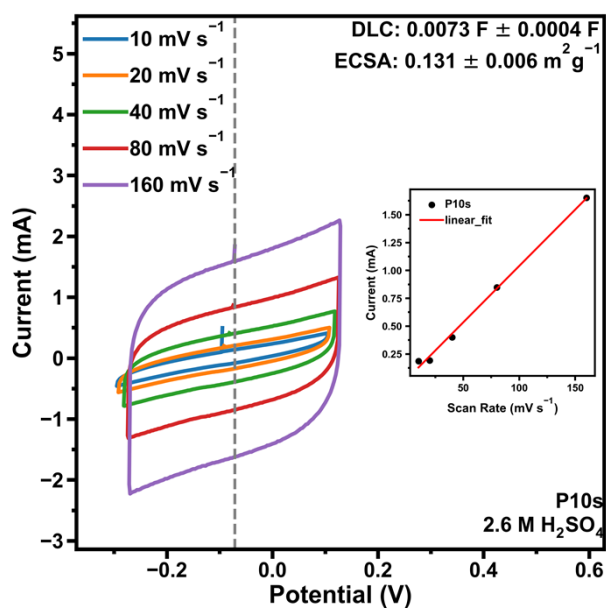

**Figure S14:** P10s cyclic voltammetry showcasing non-faradaic current at different scan rates and linear fit of a current vs scan rate plot.

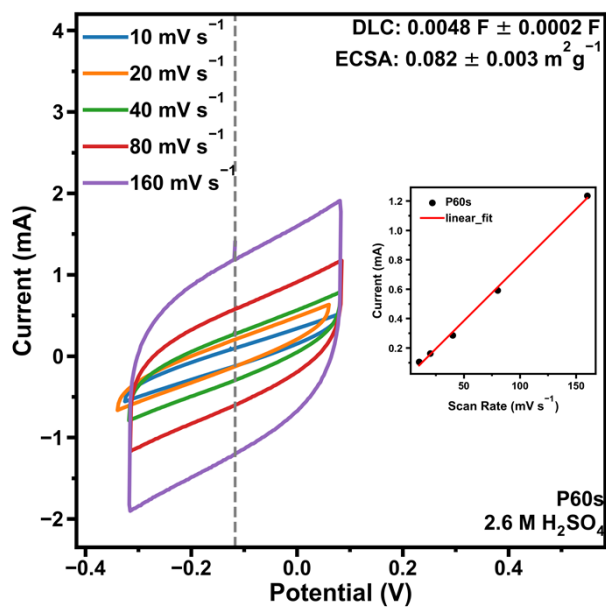

**Figure S15:** P60s cyclic voltammetry showcasing non-faradaic current at different scan rates and linear fit of a current vs scan rate plot.

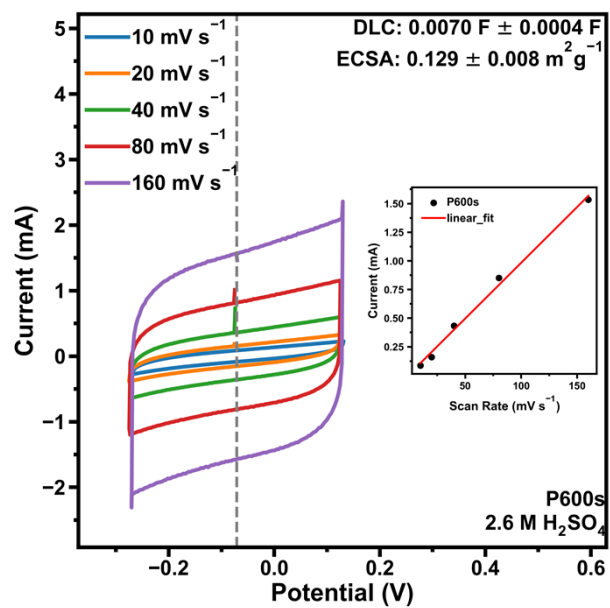

**Figure 16:** P600s cyclic voltammetry showcasing non-faradaic current at different scan rates and linear fit of a current vs scan rate plot.

## BET analysis.

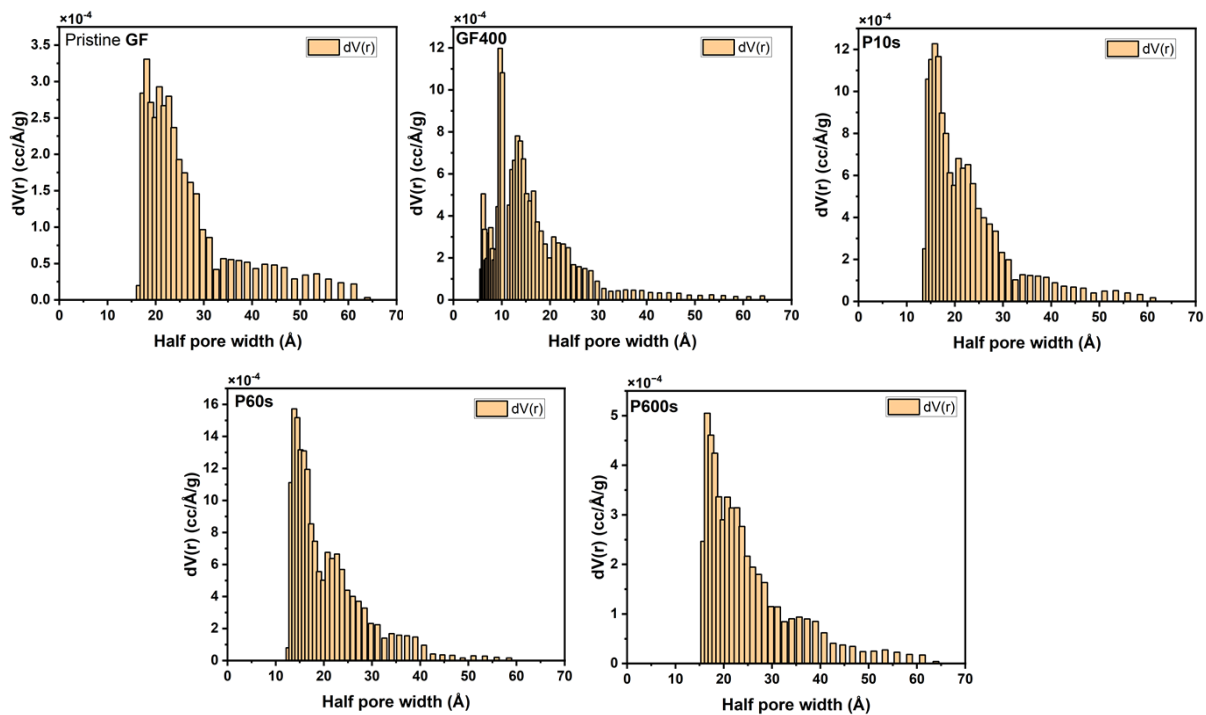

Figure S17: Pore-size distributions from electrodes as derived from BET analysis.

## Single-electrolyte cell analysis.

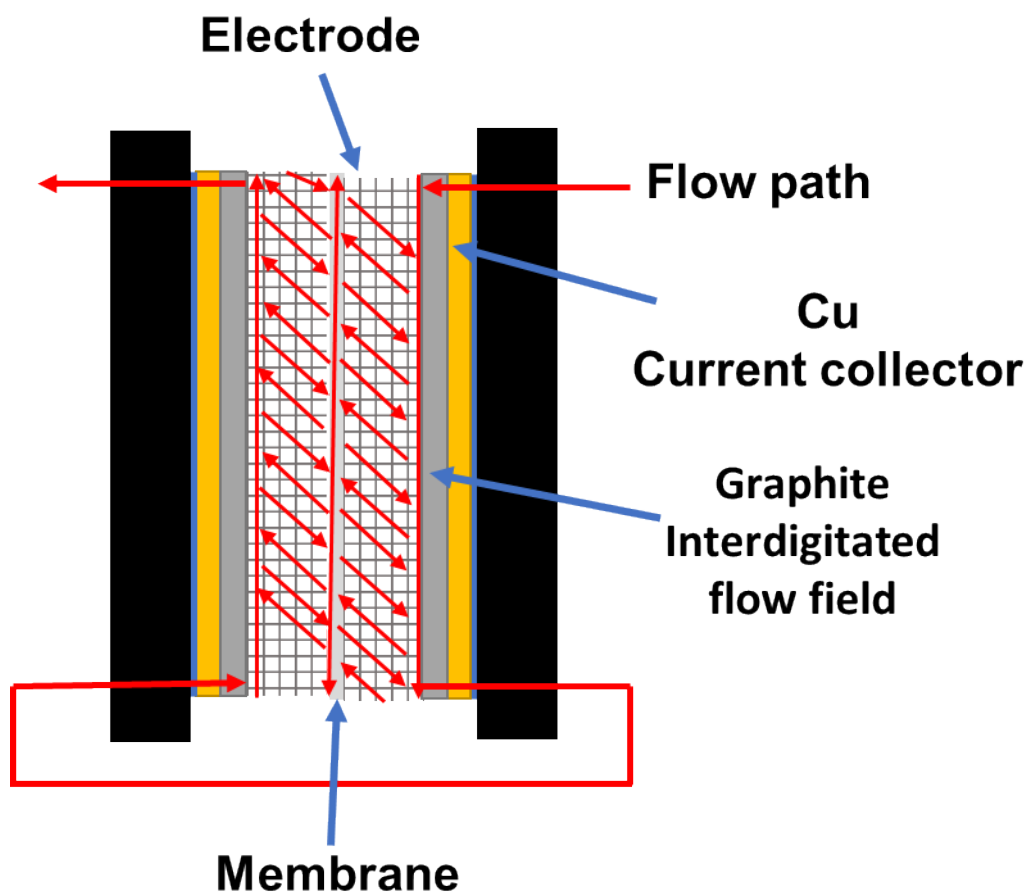

Figure S18: Schematic of a Single-electrolyte flow cell.

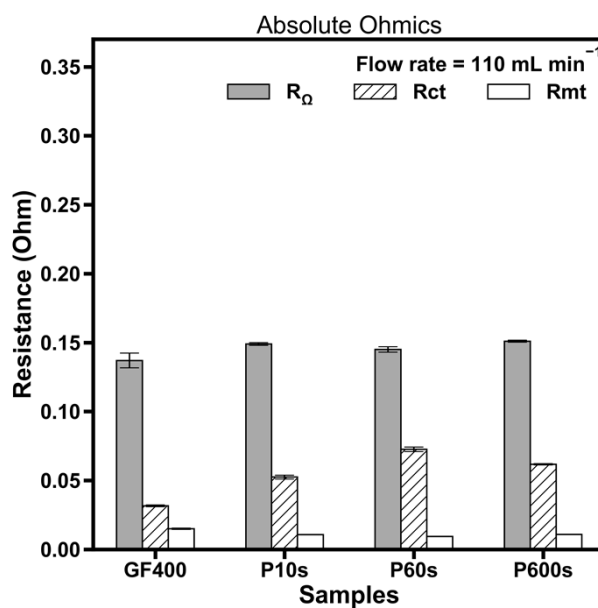

Figure S19: Breakdown of impedance contributions: Ohmic resistance ( $R_s$ ), charge-transfer resistance ( $R_{ct}$ ) and mass-transport resistance ( $R_{mt}$ ) at 110 mL min<sup>-1</sup>

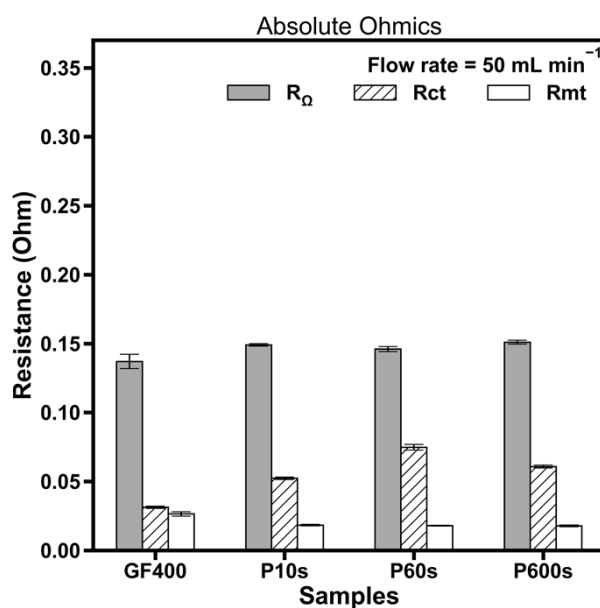

**Figure S20:** Breakdown of impedance contributions: Ohmic resistance ( $R_s$ ), charge-transfer resistance ( $R_{ct}$ ) and mass-transport resistance ( $R_{mt}$ ) at 50 mL min<sup>-1</sup>

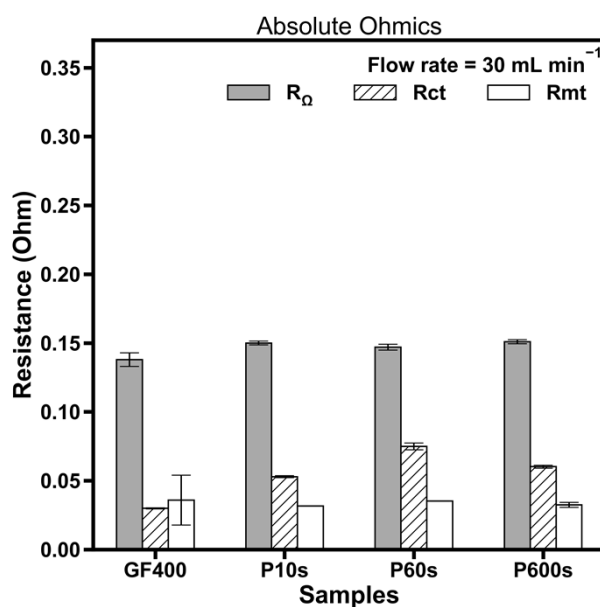

**Figure S21:** Breakdown of impedance contributions: Ohmic resistance ( $R_s$ ), charge-transfer resistance ( $R_{ct}$ ) and mass-transport resistance ( $R_{mt}$ ) at 30 mL min<sup>-1</sup>

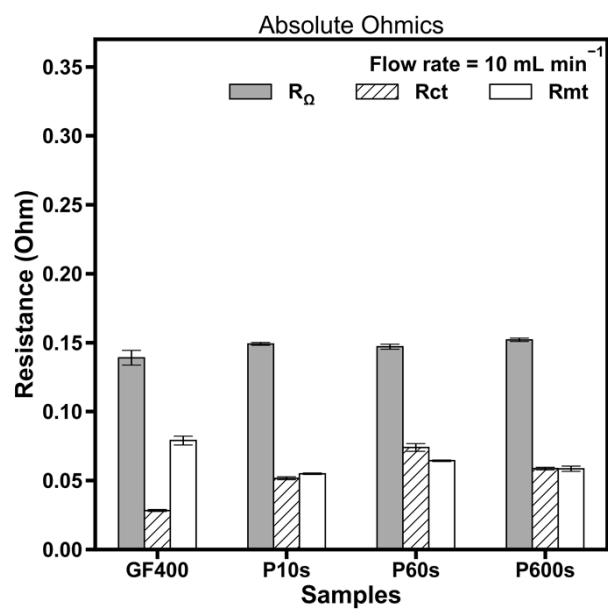

**Figure S22:** Breakdown of impedance contributions: Ohmic resistance ( $R_s$ ), charge-transfer resistance ( $R_{ct}$ ) and mass-transport resistance ( $R_{mt}$ ) at 10 mL min<sup>-1</sup>

## Pressure drop analysis.

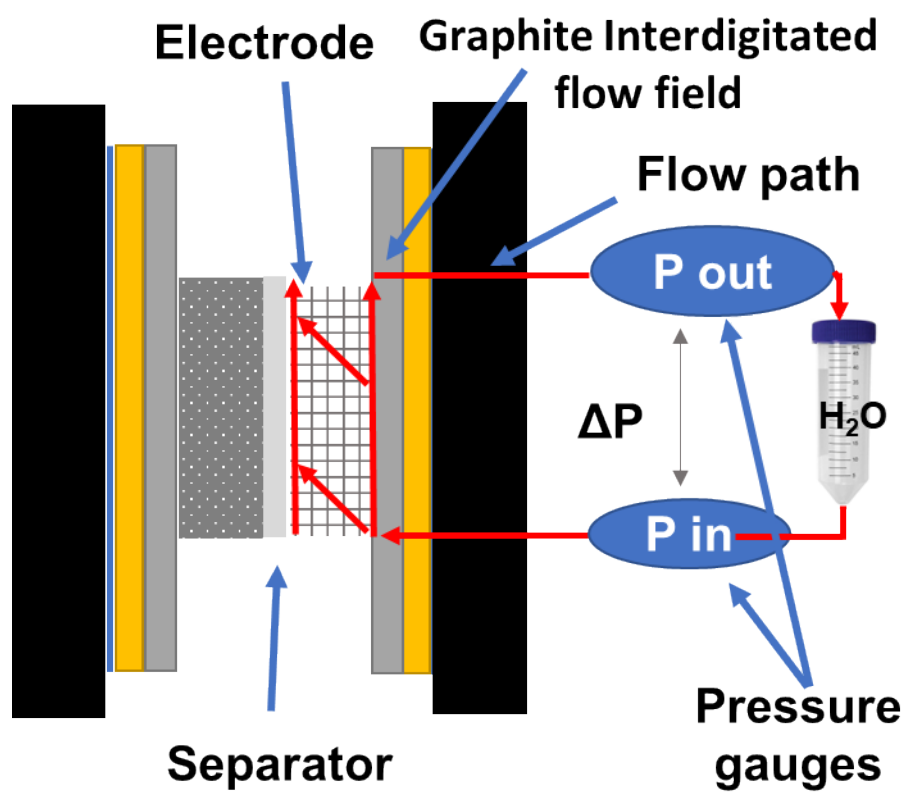

Figure S23: Schematic of a Flow cell set up to perform pressure drop measurements.

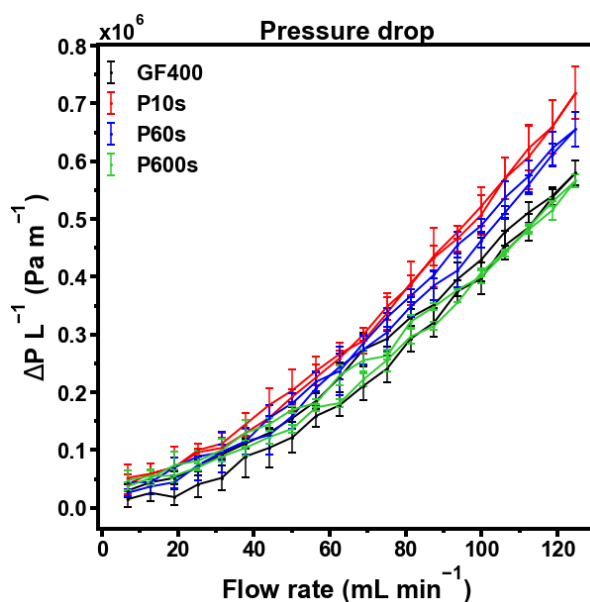

Figure S24: Pressure drop plot from different electrodes showcasing curve hysteresis.



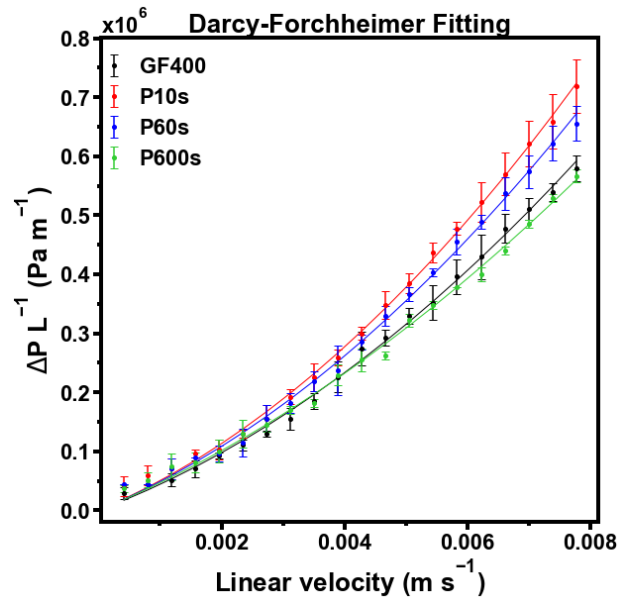

Figure S25: Darcy-Forchheimer fitting.

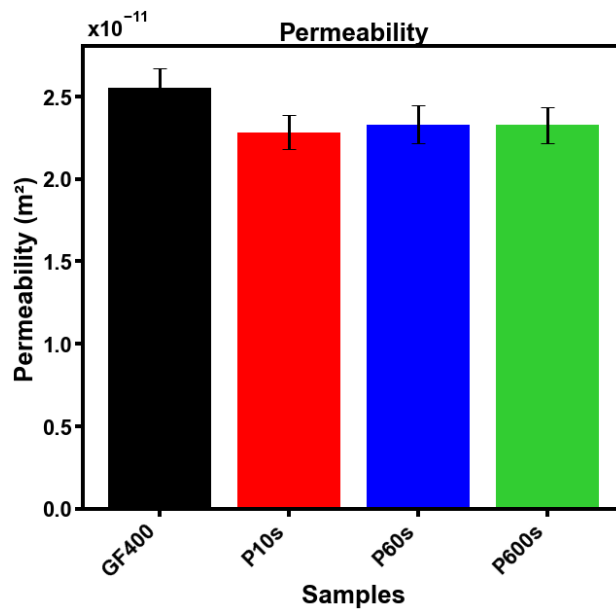

Figure S26: Permeability values derived from Darcy-Forchheimer fitting
